# Supplementary material for: Application of Multiplex Genome Editing Technology on Targeted Improvement of Ecological Adaptability of the Geng Rice Variety Jiahe212
Source: Preprints.org preprint supplement (doi:10.20944/preprints202405.0728.v1), 2024-05-12
Supplement: Supplementary file 1 [file supplementary]

**Table S1.** Primers used in this study.

| Primer name      | Primer sequence (5'–3')    | Application                                              | Primer name    | Primer sequence (5'–3') | Application                                                |
|------------------|----------------------------|----------------------------------------------------------|----------------|-------------------------|------------------------------------------------------------|
| <i>Hd2-g++</i>   | GGCA GCTCATCACAACCAAACCGC  | <i>Hd2</i> Construction of knockout vectors              | <i>Ghd7-F</i>  | GCCGAAGAACTGGAAGCTC     | <i>Ghd7</i> Sequencing identification of knockout targets  |
| <i>Hd2-g--</i>   | AAAC GCGGTTTGGTTGTGATGAGC  |                                                          | <i>Ghd7-R</i>  | GCCACTTCTAAGATCACACT    |                                                            |
| <i>Ghd7-g++</i>  | GGCA ATGTCGATGGGACCAGCAGC  | <i>Ghd7</i> Construction of knockout vectors             | <i>DTH8-F</i>  | AAGGAGAGCATCACCACTCC    | <i>DTH8</i> Sequencing identification of knockout targets  |
| <i>Ghd7-g--</i>  | AAAC GCTGCTGGTCCCATCGACAT  |                                                          | <i>DTH8-R</i>  | ACAGCATCAGCATCAACA      |                                                            |
| <i>DTH8-g++</i>  | GGCA CATCAGCTTCGTTACAGGCG  | <i>DTH8</i> Construction of knockout vectors             | <i>Pi21-F</i>  | GAGCATGCCTGTTAATTGCAA   | <i>Pi21</i> Sequencing identification of knockout targets  |
| <i>DTH8-g--</i>  | AAAC CGCCTGTAAACGAAGCTGATG |                                                          | <i>Pi21-R</i>  | ATCTCCTTGATGATCTTGCCG   |                                                            |
| <i>Pi21-g++</i>  | GGCA TGCCAAGATCAGGAAGGTCC  | <i>Pi21</i> Construction of knockout vectors             | <i>Badh2-F</i> | ATCCATCTCCGTATCTCT      | <i>Badh2</i> Sequencing identification of knockout targets |
| <i>Pi21-g--</i>  | AAAC GGACCTTCCTGATCTTGCCA  |                                                          | <i>Badh2-R</i> | TAGGGTGGTGACTACC        |                                                            |
| <i>Badh2-g++</i> | GGCA CAAGTACCTCCGCGCAATCG  | <i>Badh2</i> Construction of knockout vectors            | Hyg-F          | GCTGTTATGCGCCATTGTC     | Identification of Chloramphenicol Resistance               |
| <i>Badh2-g--</i> | AAAC CGATTGCGGGAGGTACTTG   |                                                          | Hyg-R          | GACGCTGTGCGAGAAGTTTC    |                                                            |
| <i>Hd2-F</i>     | CTATTC TTTCTCATTTGTGAGATT  | <i>Hd2</i> Sequencing identification of knockout targets | Cas9-F         | ACCAGACACGAGACGACTAA    | carrier identification                                     |
| <i>Hd2-R</i>     | AGAAGTGAGAAGGTAGAAGGAGGA   |                                                          | Cas9-R         | ATCGGTGCGGGCCTCTTC      |                                                            |

**Table S2.** Quantitative primers used in this study.

| Primer name     | Primer sequence (5' – 3')  | Application                     |
|-----------------|----------------------------|---------------------------------|
| <i>Ubq-q-F</i>  | GCTCCGTGGCGGTATCAT         | <i>OsActin</i> qRT-PCR analysed |
| <i>Ubq-q-R</i>  | CGGCAGTTGACAGCCCTAG        |                                 |
| <i>Hd3a-q-F</i> | GCTCACTATCATCATCCAGCATG    | <i>Hd3a</i> qRT-PCR analysed    |
| <i>Hd3a-q-R</i> | CCTTGCTCAGCTATTTAATTGCATAA |                                 |
| <i>Hd2-q-F</i>  | GAACCTATGGCAGCATGTGT       | <i>Hd2</i> qRT-PCR analysed     |
| <i>Hd2-q-R</i>  | CGTCATTGCTGCCATTGTT        |                                 |
| <i>Ghd7-q-F</i> | GCTTGAACCCAAACACGG         | <i>Ghd7</i> qRT-PCR analysed    |
| <i>Ghd7-q-R</i> | CTCATCTCGGCATAGGCTT        |                                 |
| <i>DTH8-q-F</i> | CAGGAGTGCGTGTCGGAGTT       | <i>DTH8</i> qRT-PCR analysed    |
| <i>DTH8-q-R</i> | GGTCGTCGCCGTTGATGGT        |                                 |
| <i>Pi21-q-F</i> | GGCAAGATCATCAAGGAGATCC     | <i>Pi21</i> qRT-PCR analysed    |
| <i>Pi21-q-R</i> | CTTGGGCTTCTCGCAGTGA        |                                 |

**Table S3.** Detailed mutation information of the three selected homozygotes lines.

| Line No. | Genotype           | Sequence                                     | Mutation Type |
|----------|--------------------|----------------------------------------------|---------------|
| JH-C15   | <i>Hd2</i> -JH212  | GCTCATCACAACCAAACCGC <b>CGG</b>              | +1 bp         |
|          | Allele1            | GCTCATCACAACCAAAC <b>T</b> CGC <b>CGG</b>    |               |
|          | <i>DTH8</i> -JH212 | CATCAGCTTCGTTACAGGCG <b>AGG</b>              | -4bp          |
|          | Allele1            | CATCAGCTTCGT <b>----</b> GGCG <b>AGG</b>     |               |
|          | <i>Pi21</i> -JH212 | TGCCAAGATCAGGAAGGTCC <b>TGG</b>              | +1bp          |
|          | Allele3            | TGCCAAGATCAGGA <b>A</b> GGTCC <b>TGG</b>     |               |
| JH-C18   | <i>Hd2</i> -JH212  | GCTCATCACAACCAAACCGC <b>CGG</b>              | -46bp         |
|          | Allele6            | GCTCA <b>-----</b> AC                        |               |
|          | <i>Ghd7</i> -JH212 | <b>CCG</b> GCTGCTGGTCCCATCGACAT              | +1bp          |
|          | Allele1            | <b>CCG</b> G <b>T</b> TGCTGGTCCCATCGACAT     |               |
|          | <i>DTH8</i> -JH212 | CATCAGCTTCGTTACAGGCG <b>AGG</b>              | -1bp          |
|          | Allele1            | CATCAGCTTCGTTACA-GCG <b>AGG</b>              |               |
| JH-C31   | <i>Pi21</i> -JH212 | TGCCAAGATCAGGAAGGTCC <b>TGG</b>              | +1bp          |
|          | Allele1            | TGCCAAGATCAGGAAGGT <b>T</b> C <b>TGG</b>     |               |
|          | <i>Hd2</i> -JH212  | GCTCATCACAACCAAACCGC <b>CGG</b>              | -5bp          |
|          | Allele5            | GCTCATCACAAC <b>----</b> CCGC <b>CGG</b>     |               |
|          | <i>Pi21</i> -JH212 | TGCCAAGATCAGGAAGGTCC <b>TGG</b>              | -1bp          |
|          | Allele4            | TGCGATGCCAAGATCAGGA <b>A</b> -TCC <b>TGG</b> |               |
